# Supplementary material for: The impact of COVID-19 pandemic on pet behavior and human-animal interaction: a longitudinal survey-based study in the United States
Source: Frontiers journal article supplement (doi:10.3389/fvets.2023.1291703), 2023-11-28
Supplement: Data_Sheet_1.PDF [file Data_Sheet_1.PDF]

|                           |            |                     |           |
|---------------------------|------------|---------------------|-----------|
| <b>Primary caregivers</b> |            |                     |           |
| Gender                    |            |                     |           |
| Female                    | 1667(51%)  |                     |           |
| Male                      | 1578 (48%) |                     |           |
| Not determined            | 26 (0.08%) |                     |           |
| Household pets            |            |                     |           |
| Dog only                  | 1090 (33%) |                     |           |
| Cat only                  | 1009 (31%) |                     |           |
| Both dog and cat          | 1179 (36%) |                     |           |
| <b>Dog</b>                |            | <b>Cat</b>          |           |
| Sex                       |            |                     |           |
| Female intact             | 391 (24%)  | Female intact       | 228 (14%) |
| Female spayed             | 474 (29%)  | Female spayed       | 559 (34%) |
| Male intact               | 272 (17%)  | Male intact         | 283 (17%) |
| Male neutered             | 493 (30%)  | Male neutered       | 578 (35%) |
| Current Age               |            |                     |           |
| <6M                       | 24 (1.7%)  | <6M                 | 31 (2.1%) |
| 6M – 2yrs                 | 334 (23%)  | 6M – 2yrs           | 423 (29%) |
| 3 – 7 yrs                 | 620 (43%)  | 3 – 6 yrs           | 515 (35%) |
| 8 – 12 yrs                | 360 (25%)  | 7 – 10yrs           | 244 (17%) |
| 13 – 15 yrs               | 86 (5.9%)  | 11 – 14 yrs         | 183 (12%) |
| ≥16 yrs                   | 28 (1.9%)  | ≥15 yrs             | 79 (5.4%) |
| Source                    |            |                     |           |
| Birth of family pet       | 287 (18%)  | Birth of family pet | 330 (21%) |
| Breeder                   | 532 (34%)  | Breeder             | 218 (14%) |
| Shelter/rescue            | 587 (38%)  | Shelter/rescue      | 727(46%)  |
| Other                     | 154 (9.9%) | Other               | 318 (20%) |
| Age at acquisition        |            |                     |           |
| <2 M                      | 353 (24%)  | <2 M                | 445 (27%) |
| 2 – 5 M                   | 572 (38%)  | 2 – 6 M             | 536 (33%) |
| 6M – 1 yr                 | 323 (22%)  | 6M – 1 yr           | 309 (19%) |
| 2 – 7 yrs                 | 208 (14%)  | 1 – 3 yrs           | 262 (16%) |
| >7yrs                     | 36 (2.4%)  | 3 – 7 yrs           | 68 (4.1%) |
|                           |            | >7yrs               | 27 (1.6%) |
| Length of ownership       |            |                     |           |
| <1yr                      | 99 (8.8%)  | <1yr                | 140 (12%) |
| 1 – 5yrs                  | 541 (48%)  | 1 – 5yrs            | 783 (64%) |
| >5yrs                     | 480 (43%)  | >5yrs               | 293 (24%) |
